# Supplementary material
Source: PubMed Central journal article supplement (PMC8569411)
Supplement: bloodBLD2020010452-suppl1.pdf [file bloodBLD2020010452-suppl1.pdf]

## Supplementary Information

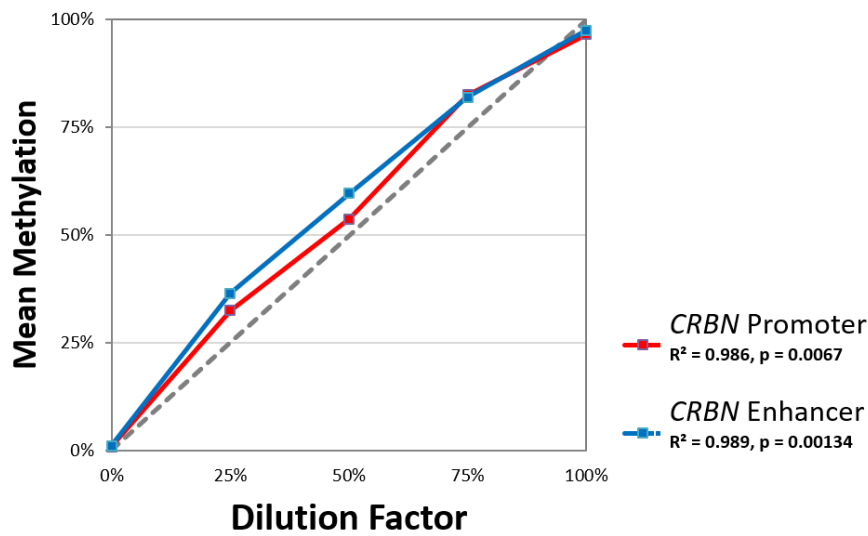

**Supplementary figure 1: Artificially methylated standard DNAs for DBS assay confirmation.**

DNA standards of 0%, 25%, 50%, 75% and 100% methylation were sequenced with the DBS assays for the two regulatory *CRBN* regions and correlated with the expected curves with  $R^2 = 0.986$  for the promoter and  $R^2 = 0.989$  for the enhancer region.

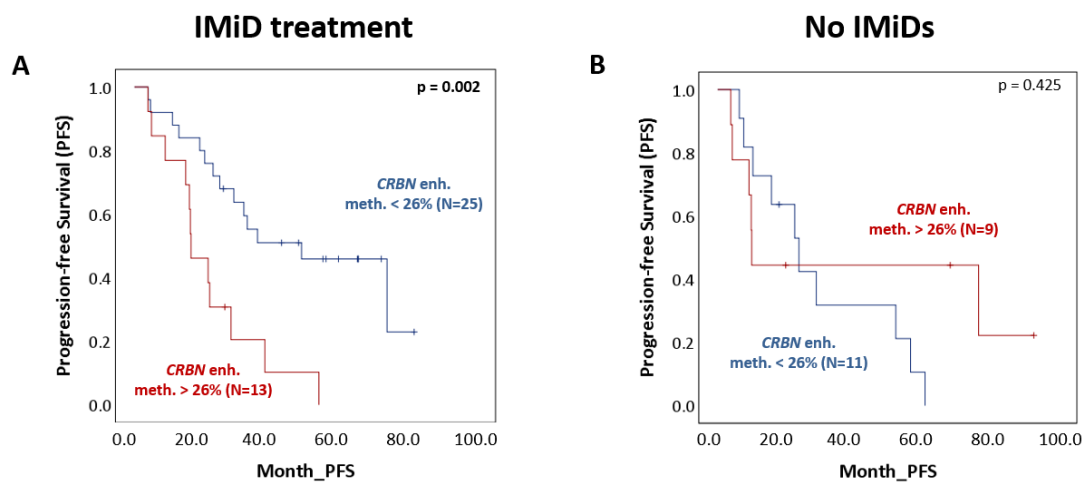

**Supplementary figure 2: Survival of patients that underwent IMiD (THAL or LEN containing) therapies.**

Kaplan-Meier analysis of NDMM patients that underwent IMiD (THAL or LEN) containing therapies. Patients with *CRBN* enhancer methylation over 26% (red) showed significantly inferior progression-free survival (PFS) (A) compared to patients with methylation levels lower than 26% (blue). NDMM patients not pretreated with IMiDs did not show differences in survival. The analyses were performed with IBM SPSS Statistics 26. A univariate log-ranked test (Mantel-Cox) and Chi-Square were used to compare the survival curves in different groups. A p-value of <0.05 was considered statistically significant.

**Supplementary table 1:** Primers used for DBS.

| Gene        | Primer | Template-specific sequence (5'-3')      | Amplicon length | Chromosomal assay location <sup>c</sup> | Number of CpGs | Annealing Temp. [°C] |
|-------------|--------|-----------------------------------------|-----------------|-----------------------------------------|----------------|----------------------|
| <i>CRBN</i> | F      | <sup>a</sup> ATGTTAAGGGTTGGAATAAAGTGA   | 426 bp          | Chr3:                                   | 39             | 56                   |
| Promoter    | R      | <sup>b</sup> TCCCAAACCCAACACTACACC      |                 | 3179543-3179968                         |                |                      |
| <i>CRBN</i> | F      | <sup>a</sup> GTTTGGTTTGGGAAATGAGTTTAAAT | 348 bp          | Chr3:                                   | 7              | 57                   |
| Enhancer    | R      | <sup>b</sup> CAAATAATTCTCCTACCCCAACT    |                 | 3173156-3173503                         |                |                      |

<sup>a</sup> upstream universal adapter 1: ACACTCTTCCCTACACGACGCTCTCCGATCT

<sup>b</sup> upstream universal adapter 2: GTGACTGGAGTTCAGACGTGTGCTCTCCGATCT

<sup>c</sup> Ensembl release GRCh38p12

Abbreviations: F, forward primer; R, reverse primer

**Supplementary table 2:** Primers used for luciferase reporter assay.

| Gene        | Primer | Template-specific sequence (5'-3')            | Amplicon length | Chromosomal assay location* | Number of CpGs | Annealing Temp. [°C] |
|-------------|--------|-----------------------------------------------|-----------------|-----------------------------|----------------|----------------------|
| <i>CRBN</i> | F      | <b>CCC</b> ACTAGTTTGTACTTCTGAGTCCTTC          | 412 bp          | Chr3:                       | 10             | 58                   |
| Enhancer    | R      | GGG <b>AGATCT</b> ACAGGTAAACAATTTATAG<br>AATC |                 | 3:3173004-3173415           |                |                      |

Forward primer contains a Spel recognition site (ACTAGT), reverse primer a BglII restriction site (AGATCT), both highlighted in bold

\* Ensembl release GRCh38p12

**Supplementary table 3.** Raw data measurements of the dual-luciferase reporter assay in L363 cell line. All measurements were performed in triplicates.

| Vector                                   | Firefly |         |         | Renilla |       |       | Ratio    |          |          |
|------------------------------------------|---------|---------|---------|---------|-------|-------|----------|----------|----------|
| CMV/EF1                                  | 2195890 | 2385475 | 2608292 | 436     | 504   | 576   | 5036.445 | 4733.085 | 4528.285 |
| MP vector w/o insert                     | 38      | 50      | 48      | 4036    | 6326  | 6428  | 0.009415 | 0.007904 | 0.007467 |
| <i>CRBN</i> Enhancer                     | 2803    | 3268    | 2536    | 16523   | 16156 | 14802 | 0.169642 | 0.202278 | 0.171328 |
| <b>unmethylated</b> <i>CRBN</i> Enhancer | 89      | 73      | 65      | 14076   | 14569 | 14771 | 0.006323 | 0.005011 | 0.004401 |
| <b>methylated</b> <i>CRBN</i> Enhancer   |         |         |         |         |       |       |          |          |          |

Abbreviations: MP, minimal promoter; CMV, cytomegalovirus

**Supplementary table 4:** Characteristics of patients with relapsed/refractory multiple myeloma (rrMM) at sampling.

| Parameter                                                     |               |            |
|---------------------------------------------------------------|---------------|------------|
| Patients, n                                                   |               | 52         |
| Gender, n (%)                                                 | Male          | 19 (37)    |
|                                                               | Female        | 33 (63)    |
| Age at diagnosis of MM, years (range)                         |               | 57 (33-77) |
| Time between initial diagnosis and sampling, months (range)   |               | 50 (2-215) |
| Subtype, n (%)                                                | IgG           | 29 (56)    |
|                                                               | Non-IgG       | 11 (21)    |
|                                                               | LC            | 12 (23)    |
| ISS Stage, n (%)                                              | I             | 22 (42)    |
|                                                               | II            | 8 (15)     |
|                                                               | III           | 4 (8)      |
|                                                               | NA            | 18 (35)    |
| Cytogenetics, n (%)                                           | High risk*    | 15 (29)    |
|                                                               | Standard-risk | 28 (54)    |
|                                                               | NA            | 9 (17)     |
| Prior lines of therapies at the time point of sampling, n (%) | 1-3           | 32 (61)    |

|                                                          |                         |         |
|----------------------------------------------------------|-------------------------|---------|
|                                                          | 4-6                     | 15 (29) |
|                                                          | >6                      | 4 (8)   |
|                                                          | NA                      | 1 (2)   |
| <b>Pretreatment at the time point of sampling, n (%)</b> |                         |         |
| IMiD, n (%)                                              | Lenalidomide            | 41 (79) |
|                                                          | Pomalidomide            | 17 (33) |
|                                                          | Thalidomide             | 11 (21) |
|                                                          | None                    | 11 (21) |
| PI, n (%)                                                | Bortezomib              | 45 (87) |
|                                                          | Carfilzomib             | 15 (29) |
|                                                          | None                    | 6 (12)  |
| Monoclonal antibody, n (%)                               | Elotuzumab              | 2 (4)   |
|                                                          | Daratumumab             | 4 (8)   |
|                                                          | None                    | 46 (88) |
| Autologous stem cell transplant, n (%)                   | Yes                     | 45 (87) |
|                                                          | No                      | 7 (13)  |
| <b>IMiD-refractory patients, n (%)</b>                   |                         | 27 (52) |
|                                                          | Lenalidomide-refractory | 19 (37) |
|                                                          | Pomalidomide-refractory | 14 (27) |
|                                                          | Both                    | 6 (12)  |

Abbreviations: IMiD, immunomodulatory drugs; PI, proteasome inhibitors; \* defined as presence of at least one of the following: t(4;14), t(14;16), t(14;20), del17p

**Supplementary table 5:** Characteristics of patients with newly diagnosed MM (NDMM) for survival analysis.

| Parameter                                         |               |            |
|---------------------------------------------------|---------------|------------|
| <b>Patients, n</b>                                |               | 58         |
| <b>Gender, n (%)</b>                              | Male          | 32 (55)    |
|                                                   | Female        | 26 (45)    |
| <b>Age at diagnosis of MM, years (range)</b>      |               | 65 (42-92) |
| <b>Increased LDH level at diagnosis, n (%)</b>    | Yes           | 6 (10)     |
|                                                   | No            | 52 (90)    |
| <b>Subtype, n (%)</b>                             | IgG           | 37 (64)    |
|                                                   | Non-IgG       | 16 (28)    |
|                                                   | LC            | 5 (8)      |
| <b>ISS Stage, n (%)</b>                           | I             | 16 (28)    |
|                                                   | II            | 26 (44)    |
|                                                   | III           | 16 (28)    |
| <b>Cytogenetics, n (%)</b>                        | High risk*    | 10 (17)    |
|                                                   | Standard-risk | 35 (60)    |
|                                                   | NA            | 13 (23)    |
| <b>Bone lesions at diagnosis, n (%)</b>           | Yes           | 46 (79)    |
|                                                   | No            | 12 (21)    |
| <b>Extramedullary disease at diagnosis, n (%)</b> | Yes           | 2 (3)      |
|                                                   | No            | 56 (97)    |
|                                                   | Yes**         | 0 (0)      |
| <b>Renal impairment at diagnosis, n (%)</b>       | No            | 49 (84)    |
|                                                   | NA            | 9 (16)     |
| <b>Treatment received, n (%)</b>                  | Yes           | 38 (77)    |
| Frontline therapy including IMiD, n (%)           | No            | 20 (23)    |
| Autologous stem cell transplant, n (%)            | Yes           | 35 (60)    |
|                                                   | No            | 23 (40)    |

Abbreviations: IMiD, immunomodulatory drugs; PI, proteasome inhibitors; \* defined as presence of at least one of the following: t(4;14), t(14;16), t(14;20), del17p; \*\*defined as serum creatinine levels  $\geq 2$  mg/dL

**Supplementary table 6:** Patients with mutations in IMiD resistance associated genes (M3P panel sequencing) and *CRBN* enhancer methylation status (DBS) at sampling time point.

| Case | M3P             |                    |             |                      |               | DBS     |                         |          |
|------|-----------------|--------------------|-------------|----------------------|---------------|---------|-------------------------|----------|
|      | Associated Gene | Mutation location* | Base Change | Putative Consequence | Mutation Type | Het/Hom | <i>CRBN</i> Methylation | Coverage |
| 1    | <i>CRBN</i>     | chr3:3195724       | C/T         | p.Asp291Asn          | missense      | het     | 71%                     | 15,603   |
| 2    | <i>CUL4B</i>    | chrX:119679342     | C/G         | p.Asp311His          | missense      | het     | 56%                     | 22,264   |
| 3    | <i>CRBN</i>     | chr3:3215768       | T/A         | p.Arg118Ter          | nonsense      | het     | 23%                     | 15,205   |
| 4    | <i>IKZF3</i>    | chr17:37947786     | C/G         | p.Gly159Arg          | missense      | het     | 72%                     | 13,972   |

Abbreviations: DBS, Deep Bisulfite Sequencing; M3P, Mutation Panel Version 3, het, heterozygous, \*GRCH37

**Supplementary table 7:** IMiD refractory patients subdivided by POM and LEN. Patients with methylation degrees over 26% are highlighted.

| Cohort                                     | Patient ID  | Methylation       | Prior lines of therapy |
|--------------------------------------------|-------------|-------------------|------------------------|
| LEN refractory                             | 1882_M_2_48 | 82.00%            | 9                      |
|                                            | 1809_M_2_45 | 70.86%            | 2                      |
|                                            | 1745_M_1_2  | 71.00%            | 4                      |
|                                            | 1758_M_1_6  | 56.29%            | 2                      |
|                                            | 1752_M_2_43 | 53.57%            | 4                      |
|                                            | 1829_M_1_28 | 46.29%            | 3                      |
|                                            | 1772_M_1_11 | 44.86%            | 1                      |
|                                            | 1802_M_1_20 | 27.57%            | 3                      |
|                                            | 1867_M_1_31 | 27.29%            | 2                      |
|                                            | 1912_M_1_35 | 12.86%            | 2                      |
|                                            | 1908_M_1_34 | 11.71%            | 2                      |
|                                            | 1833_M_1_29 | 10.29%            | 6                      |
|                                            | 1754_M_1_5  | 7.71%             | 3                      |
| <b>Percentage of cases hypermethylated</b> |             | <b>69% (9/13)</b> | <b>3.31 ± 2.14</b>     |
| POM refractory                             | 1976_M_1_48 | 83.29%            | 6                      |
|                                            | 1868_M_1_32 | 71.71%            | 2                      |
|                                            | 1944_M_42   | 70.71%            | 5                      |
|                                            | 1774_M_1_12 | 65.43%            | 3                      |
|                                            | 1926_M_1_39 | 62.71%            | 5                      |
|                                            | 1960_M_1_46 | 34.29%            | 2                      |
|                                            | 1744_M_1_1  | 8.71%             | 7                      |
|                                            | 1957_M_1_45 | 5.00%             | 4                      |
| <b>Percentage of cases hypermethylated</b> |             | <b>75% (6/8)</b>  | <b>4.25 ± 2.14</b>     |
| LEN and POM refractory                     | 1914_M_1_37 | 81.57%            | 10                     |
|                                            | 1787_M_1_16 | 29.29%            | 6                      |
|                                            | 1800_M_1_19 | 27.14%            | 4                      |
|                                            | 1806_M_1_22 | 22.57%            | 4                      |
|                                            | 1644_M_2_41 | 7.57%             | 7                      |
|                                            | 1797_M_1_18 | 3.57%             | 3                      |
| <b>Percentage of cases hypermethylated</b> |             | <b>50% (3/6)</b>  | <b>5.67 ± 2.58</b>     |

**Supplementary table 8:** Annexin V Propidium Iodide (PI) cell survival data after DNMTi/Len treatment.

| Cell Line | Drug Exposure   | Mean Survival | Standard Deviation (SD) | Relative to control [%] | p-Value      |
|-----------|-----------------|---------------|-------------------------|-------------------------|--------------|
| OPM2      | Control DMSO    | 94.8          | 0.53                    | 100.0                   |              |
|           | Dec + / Len -   | 92.5          | 3.03                    | 97.5                    | n.s. 0.265   |
|           | Aza + / Len -   | 93.1          | 2.68                    | 98.2                    | n.s. 0.333   |
|           | DNMTi - / Len + | 84.0          | 4.54                    | 100.0                   |              |
|           | Dec + / Len +   | 71.5          | 2.08                    | 85.0                    | *0.011       |
|           | Aza + / Len +   | 46.5          | 10.65                   | 55.3                    | **0.005      |
| KMS-11    | Control DMSO    | 92.8          | 1.56                    | 100.0                   |              |
|           | Dec + / Len -   | 83.6          | 11.26                   | 90.1                    | n.s. 0.234   |
|           | Aza + / Len -   | 84.2          | 1.75                    | 90.1                    | n.s. 0.135   |
|           | DNMTi - / Len + | 58.2          | 4.49                    | 100.0                   |              |
|           | Dec + / Len +   | 40.0          | 16.54                   | 68.8                    | n.s. (0.141) |
|           | Aza + / Len +   | 25.0          | 10.22                   | 43.0                    | ** 0.007     |

Abbreviations: Aza +, 48 hours exposure to 500 nM 5-azacytidine; Dec +, 72 hours exposure to 100 nM 5-aza-2'-deoxycytidine; Len +, 5 days exposure to 10 $\mu$ M lenalidomide after DNMTi pretreatment; all experiments were performed at least in triplicates. (Significance level: \*p < 0.05, \*\*p < 0.01, and \*\*\*p < 0.001).

## Supplementary Methods

### Deep Bisulfite Sequencing (DBS)

DNA isolation was performed with the AllPrep DNA/RNA Micro Kit (Qiagen). For bisulfite conversion, 100-200ng genomic DNA per sample was processed using the EpiTect<sup>®</sup> Fast 96 Bisulfite Conversion Kit (Qiagen). Deep Bisulfite Sequencing (DBS) libraries were paired-end sequenced with the Illumina MiSeq platform and prepared by enrichment PCRs with target-specific primers (**SI table 1**). Assays were established with artificially (un)methylated DNA standards with R<sup>2</sup>=0.986 for *CRBN* promoter and R<sup>2</sup>=0.989 for *CRBN* enhancer (**SI figure 1**). FASTQ files were aligned using the Amplifyzer2 pipeline (<https://doi.org/10.7287/peerj.preprints.122v2>).

### Expression analysis

Real-time qPCR of *CRBN* was performed on 26 MM samples and 15 PBMCs. RNA was isolated from cell pellets using the AllPrep DNA/RNA kit (Qiagen) and reverse transcribed by SuperScript IV VILO Mastermix (Thermo Fisher Scientific). The StepOnePlus was used with TaqMan reagent kits and molecular probes (Applied Biosystems): Hs00372266\_m1 for *CRBN* and Hs00939627\_m1 for the control GUSB. All samples were analyzed in triplicates.

### Luciferase reporter assay

Functional analysis of the *CRBN* enhancer was performed with a dual-luciferase reporter assay. To properly initiate the transcription, a CpG free minimal promoter (MP, 5'-AGAGGGTATATAATGGAAGCTTAACTTCCAG-3') was cloned into the pCpGL empty vector. The backbone of the pCpGL vector is completely CpG dinucleotide free to guarantee that the vector is only repressed due to the presence of functionally important methylated CpG dinucleotides within the insert. The forward primer contained a SpeI and the reverse primers a BglII recognition site (**SI table 2**). After double digestion, the insert was ligated into the multiple cloning site of the pCpGL vector upstream of the luciferase gene and transformed into one shot PIR1 competent cells (Thermo Fisher Scientific). Selection was conducted via Zeocin resistance and confirmed by Sanger sequencing. A colony PCR was done with CCTGTAAAGTCTTTATCACACTACC as forward primer and CCTCACAGACATCTCAAAGTATTC as reverse primer. Plasmid DNA was purified and *in vitro* methylated using SssI, HhaI and HpaII methyltransferases (New England Biolabs). A confirmation digestion experiment was conducted with the enzymes HpaII (methylation sensitive) and MspI (methylation insensitive) (New England Biolabs). Either the methylated or the unmethylated pCpGL vector was co-transfected with Renilla control vector (20:1 ratio) into L363 cells by electroporation. To overcome transfection efficiency bias, a CD4 $\Delta$ -expression plasmid was cotransfected and the positive population was isolated by magnetic bead retention followed by OptiPrep purification. Luciferase activity of 300.000 cells was measured in triplicates with a Spark microplate reader (Tecan Life Sciences) and a normalization of the pCpGL reporter (firefly fluorescence) was done against the activity of the Renilla control vector (**SI table 3**). Empty pCpGL vector with a minimal promoter (MP) served as negative control, pCpGL with a cytomegalovirus (CMV) promoter inserted as positive control.

### **Cell culture and drug treatment**

The human L363 cell line was purchased from DSMZ (Leibniz Institute DSMZ–German Collection of Microorganisms and Cell Cultures, Braunschweig, Germany). OPM2 and KMS-11 were kindly provided by Dr. Leif Bergsagel's laboratory. All myeloma cell lines were cultured under sterile conditions at 37°C with 5% CO<sub>2</sub> in a humidified atmosphere in RPMI-1640 media, supplemented with 10% fetal calf serum, 1mM sodium pyruvate, 2mM glutamine, 100 U/ml penicillin, and 100 µg/ml streptomycin. OPM2 and KMS-11 cells were pretreated for 48 hours in 500 nM 5-azacytidine (Sigma Aldrich, St. Louis, MO, USA) or 72 hours in 100 nM 5-aza-2'-deoxycytidine (decitabine; Selleck Chemicals, Houston, TX, USA). The demethylation of the *CRBN* enhancer region after pretreatment with DNMTi was monitored via pyrosequencing of bisulfite converted DNA using the following primers: forward primer GTTTGGTTTGGGAAATGAGTTTAAAT, reverse primer Biotin-CAAATAATTCTCCTACCCCAACT, pyrosequencing primer 1 TGTGATTTAAAATAAATAAAATTG and pyrosequencing primer 2 GGGTGGATTATTTGAGG. Four of the 7 CpGs within the target region were covered. Pyrosequencing was performed on a PyroMark Q96 MD system (Qiagen, Hilden, Germany) using the PyroMark Gold Q96 CDT reagent kit (Qiagen), 10 pmol of the sequencing primer, and Pyro Q-CpG software for data analysis (Qiagen). Then, 10.000 cells per well were seeded into 96 well plates and incubated with lenalidomide (Selleck Chemicals, Houston, TX, USA) for 5 days. Cell survival was measured with Annexin V Propidium Iodide (PI) viability/cell death measurements. All drug solutions were always freshly prepared from concentrated stocks. The solvent for the stock solution was DMSO. All experiments were performed in triplicates and repeated at least once. Flow cytometry was performed with a FACS Calibur (BD Biosciences, Heidelberg, Germany) and data was analysed with FlowJo version 8.8.7 (Tree Star, Inc., Ashland, USA). Statistical analyses were performed with IBM SPSS Statistics 26 using T-Test for normally distributed measurements and Mann-Whitney U for nonparametric data.
